# Supplementary material
Source: PubMed Central journal article supplement (PMC3974361)
Supplement: CJN.07650713_CJN07650713SupplementaryData.pdf [file CJN.07650713_CJN07650713SupplementaryData.pdf]

## SUPPLEMENTAL MATERIAL

**WEB TABLE 1.** Billing codes for acute kidney injury, chronic kidney disease, dialysis, and transplant used to stratify hospitalizations

| Kidney disease classification | Description                                                       | ICD-9-code                     | ICD-10-code                    |
|-------------------------------|-------------------------------------------------------------------|--------------------------------|--------------------------------|
| AKI                           | Acute kidney injury                                               | 584.x                          | N17.x                          |
| CKD                           | Chronic glomerulonephritis                                        | 582                            | N03                            |
| CKD                           | Nephritis and nephropathy                                         | 583                            |                                |
| CKD                           | Chronic kidney disease                                            | 585, 585.x<br>where $x \geq 3$ | N18, N18.x<br>where $x \geq 3$ |
| CKD                           | Renal failure                                                     | 586                            | N19                            |
| CKD                           | Renal sclerosis                                                   | 587                            | N26                            |
| CKD                           | Disorders resulting from impaired renal function                  | 588                            | N25                            |
| CKD                           | Hypertensive chronic kidney disease                               | 403                            | I12                            |
| CKD                           | Hypertensive heart and kidney disease                             | 404                            | I13                            |
| CKD                           | Unspecified disorder of the kidney and ureter                     | 593.9                          |                                |
| CKD                           | Diabetes with renal complications                                 | 250.4                          | E10.2,<br>E11.2, E13.2         |
| Transplant                    | Kidney replaced by transplant                                     | V42.0                          | Z94.0                          |
| Transplant                    | Transplant of kidney                                              | 55.6                           |                                |
| Transplant                    | Complications of transplanted kidney                              | 996.81                         |                                |
| Dialysis                      | Renal dialysis status                                             | V45.1                          | Z99.2                          |
| Dialysis                      | Admission for dialysis treatment or session                       | V56                            | Z49                            |
| Dialysis                      | Hemodialysis                                                      | 39.95                          |                                |
| Dialysis                      | Peritoneal dialysis                                               | 54.98                          |                                |
| Dialysis                      | Encounter for adjustment and management of vascular access device |                                | Z45.2                          |

**WEB TABLE 2.** Categorization of AKI/ in-hospital death by serum creatinine criteria ( $\geq 0.3$  mg/dL increase in serum creatinine over 48 hours, or  $\geq 50\%$  increase in serum creatinine from baseline, or  $\geq 0.5$ mg/dL increase from baseline if peak serum creatinine  $\geq 4$  mg/dL) and urine output criteria ( $< 20$  ml/hour x 24 hours)†

|                           |        | Urine Output Criteria |                      |
|---------------------------|--------|-----------------------|----------------------|
|                           |        | AKI                   | No AKI               |
| Serum Creatinine Criteria | AKI    | N=110<br>Death=30.0%  | N=237<br>Death=13.5% |
|                           | No AKI | N=262<br>Death=5.0%   | N=1230<br>Death=2.1% |

Kappa = 0.14,  $p < 0.001$

†Electronic medical record sample
